# Supplementary material for: Tumor suppressors BTG1 and IKZF1 cooperate during mouse leukemia development and increase relapse risk in B-cell precursor acute lymphoblastic leukemia patients
Source: PubMed Central journal article supplement — Haematologica. 2016 Dec 14;102(3):541–51. doi: 10.3324/haematol.2016.153023 (PMC5394950; doi:10.3324/haematol.2016.153023), 2017-03
Supplement: 2016.153023.SCHEIJEN_SUPPL.pdf [file 2016.153023.SCHEIJEN_SUPPL.pdf]

## Tumor suppressors BTG1 and IKZF1 cooperate during mouse leukemia development and increase relapse risk in B-cell precursor acute lymphoblastic leukemia patients

Blanca Scheijen,<sup>1\*</sup> Judith M. Boer,<sup>2\*</sup> René Marke,<sup>1\*</sup> Esther Tijchon,<sup>1</sup> Dorette van Ingen Schenau,<sup>1</sup> Esmé Waanders,<sup>3,4</sup> Liesbeth van Emst,<sup>1</sup> Laurens T. van der Meer,<sup>1</sup> Rob Pieters,<sup>4</sup> Gabriele Escherich,<sup>5</sup> Martin A. Horstmann,<sup>5</sup> Edwin Sonneveld,<sup>6</sup> Nicola Venn,<sup>7</sup> Rosemary Sutton,<sup>7</sup> Luciano Dalla-Pozza,<sup>8</sup> Roland P. Kuiper,<sup>3,4</sup> Peter M. Hoogerbrugge,<sup>4</sup> Monique L. den Boer<sup>2</sup> and Frank N. van Leeuwen<sup>1</sup>

<sup>1</sup>Laboratory of Pediatric Oncology, Radboud university medical center, Nijmegen, the Netherlands; <sup>2</sup>Department of Pediatric Oncology, Erasmus MC-Sophia Children's Hospital, Erasmus University Medical Center, Rotterdam, the Netherlands; <sup>3</sup>Department of Human Genetics, Radboud university medical center, Nijmegen, the Netherlands; <sup>4</sup>Princess Máxima Center for Pediatric Oncology, Utrecht, the Netherlands; <sup>5</sup>Research Institute Children's Cancer Center and Clinic of Pediatric Hematology and Oncology, University Medical Center Hamburg-Eppendorf, Hamburg, Germany; <sup>6</sup>Dutch Childhood Oncology Group, The Hague, the Netherlands; <sup>7</sup>Australian and New Zealand Children's Oncology Group, Children's Cancer Institute Australia, Lowy Cancer Research Centre, University of New South Wales, Sydney, Australia and <sup>8</sup>Oncology Unit, The Children's Hospital at Westmead, Sydney, Australia

\*BS, JMB and RM contributed equally to this work

©2017 Ferrata Storti Foundation. This is an open-access paper. doi:10.3324/haematol.2016.153023

Received: July 19, 2016.

Accepted: December 14, 2016.

Pre-published: December 15, 2016.

Correspondence: blanca.scheijen@radboudumc.nl

---

## Supplementary Material

### Tumor suppressors *BTG1* and *IKZF1* cooperate during mouse leukemia development and increase relapse risk in B-cell precursor acute lymphoblastic leukemia patients

*Blanca Scheijen*<sup>1\*</sup>, *Judith M. Boer*<sup>2\*</sup>, *René Marke*<sup>1\*</sup>, *Esther Tijchon*<sup>1</sup>, *Dorette van Ingen Schenau*<sup>1</sup>, *Esmé Waanders*<sup>3</sup>, *Liesbeth van Emst*<sup>1</sup>, *Laurens T. van der Meer*<sup>1</sup>, *Rob Pieters*<sup>4</sup>, *Gabriele Escherich*<sup>5</sup>, *Martin A. Horstmann*<sup>5</sup>, *Edwin Sonneveld*<sup>6</sup>, *Nicola Venn*<sup>7</sup>, *Rosemary Sutton*<sup>7</sup>, *Luciano Dalla-Pozza*<sup>8</sup>, *Roland P. Kuiper*<sup>3</sup>, *Peter M. Hoogerbrugge*<sup>4</sup>, *Monique L. den Boer*<sup>2</sup> and *Frank N. van Leeuwen*<sup>1</sup>

<sup>1</sup>Laboratory of Pediatric Oncology, Radboud university medical center, Nijmegen, the Netherlands;

<sup>2</sup>Department of Pediatric Oncology, Erasmus MC-Sophia Children's Hospital, Erasmus University Medical Center, Rotterdam, the Netherlands; <sup>3</sup>Department of Human Genetics, Radboud university medical center, Nijmegen, the Netherlands; <sup>4</sup>Princess Máxima Center for Pediatric Oncology, Utrecht, the Netherlands; <sup>5</sup>Research Institute Children's Cancer Center and Clinic of Pediatric Hematology and Oncology, University Medical Center Hamburg-Eppendorf, Hamburg, Germany; <sup>6</sup>Dutch Childhood Oncology Group, The Hague, the Netherlands; <sup>7</sup>Australian and New Zealand Children's Oncology Group, Children's Cancer Institute Australia, Lowy Cancer Research Centre, University of New South Wales, Sydney, Australia; <sup>8</sup>Oncology Unit, The Children's Hospital at Westmead, Sydney, Australia.

\* BS, JMB and RM contributed equally to this work

**Corresponding author:** Blanca Scheijen, PhD, Laboratory of Pediatric Oncology, Radboud university medical center, Geert Grooteplein Zuid, 6525 GA Nijmegen, the Netherlands.

E-mail: Blanca.Scheijen@radboudumc.nl.; Phone: +31 24 3618896 ; Fax: +31 24 3666352.

## Supplementary methods

### *Cytogenetic and molecular analysis of patient samples*

Cases were screened for high hyperdiploidy (51-65 chromosomes), *ETV6-RUNX1* and *BCR-ABL1* fusion products and rearrangements of *TCF3* and *MLL* by routine diagnostic procedures. Cases in the discovery cohort were identified as *BCR-ABL1*-like, based on a previously described expression signature of 110 probe sets.<sup>1, 2</sup> The multiplex ligation-dependent probe amplification assay SALSA MLPA P335 ALL-*IKZF1* (MRC-Holland, Amsterdam, the Netherlands) was performed according to the manufacturer's protocol and analyzed as previously described.<sup>1</sup> A ratio lower than 0.75 for the exon intensity in patients versus the healthy control reference was considered to represent a deletion. For scoring *CDKN2A/B* deletion, it was sufficient to have either *CDKN2A* or *CDKN2B* deleted. Mutation status for *IKZF1* was neither assessed in discovery (n=533) nor validation (n=515) cohort.

### *Flow cytometric analysis*

Murine bone marrow (BM) cells were harvested by flushing femurs with RPMI medium (Gibco/Life technologies Europe BV, Bleiswijk, The Netherlands) containing 10% FBS (Greiner Bio-One BV, Alphen a/d Rijn, The Netherlands) and 50  $\mu$ M  $\beta$ -Mercaptoethanol (Gibco). Cells from spleen and thymus were isolated through a 70  $\mu$ M filter using RPMI medium containing 10% FBS and 50  $\mu$ M  $\beta$ -Mercaptoethanol. Leukemic blasts isolated from either lymph nodes, spleen or thymus were analyzed by FACS using the LSRII flow cytometer (BD Biosciences, Breda, The Netherlands). Single cell suspensions were treated with red blood cell lysis buffer (Sigma-Aldrich, Zwijndrecht, The Netherlands) and pre-incubated with unlabeled anti-Fc $\gamma$  III/II receptor (2.4G2) (BD Biosciences) to inhibit unspecific antibody binding. Cells were stained with the following antibodies purchased from BD Biosciences (Franklin Lakes, New Jersey) and eBiosciences (Vienna, Austria): anti-B220/CD45R (RA3-6B2); BP1 (6C3); CD4 (RM4-5); CD8 (53-6.7); CD11b/Mac1 (M1/70); CD24/HSA (M1/69); CD25 (PC61.5); CD43 (S7); CD44 (IM7); IgM (II/41); IgD (11-26c). The data were collected and analyzed by FlowJo V10 software (FlowJo, Ashland, Oregon).

### *Immunohistochemistry*

Tissues isolated from diseased mice were fixed in 4% formalin for 24 hours. Specimens were embedded in paraffin, 4  $\mu$ M serial sections were prepared and stained with hematoxylin and eosin (HE). For immunohistochemistry, slides were dewaxed and rehydrated prior to heat-induced antigen retrieval using sodium citrate buffer. After blocking with 2% goat serum and 2% BSA in 0.05% Tween-PBS, the slides were incubated overnight with B220/CD45R (RM2600) (Invitrogen, Amsterdam, The Netherlands) and CD3 (A0452) (DAKO Netherlands

BV, Heverlee, Belgium) antibodies. Biotinylated anti-rat IgG (BA9401) (Vector Laboratories, Peterborough, United Kingdom) and anti-rabbit IgG (BA1000) (Vector Laboratories) were used as secondary antibody and subsequently the slides were incubated with metal-enhanced diaminobenzidine in stable peroxide substrate buffer (Thermo Fisher Scientific Inc., Amsterdam, The Netherlands), counterstained with hematoxylin, and after dehydration coverslipped with Entellan. Four selected regions per murine liver or lung histological slide were used for the quantification of CD3<sup>+</sup> positively stained areas. The analysis was performed with FIJI software.<sup>3</sup> For the quantification of the blood smears, 10 visual fields with a 40x objective were scored for the number of blasts. In total, 10 visual fields per blood smear were averaged and for each genotype the percentage of blasts was determined for three independent mice.

#### *VDJ rearrangement analysis*

DNA was extracted from enlarged spleen or lymph nodes using the Gentra Puregene Mouse Tail kit (Qiagen, Venlo, The Netherlands). PCR analysis was performed with primers specific for the DB1-JB region of *Trb1*, D $\beta$ 2.1-J $\beta$ 2.7 region of *Trb2*, and 5'VH2-3'C $\mu$  and 5'VH2-3'C $\kappa$  primers for the *Igh* and *Igk* genes, respectively (*Supplementary Table S1*).

#### *Viability assays on murine splenic B-cells*

Spleens from healthy young (6-12 weeks of age) wild-type, *Ikzf1*<sup>+/-</sup>, *Btg1*<sup>-/-</sup> and *Btg1*<sup>-/-</sup>;*Ikzf1*<sup>+/-</sup> mice were isolated and single mononuclear cells were harvested through a 70  $\mu$ M cell strainer. Erythrocytes within the cell suspensions were removed by Red blood cell lysis buffer (Sigma-Aldrich, Zwijndrecht, The Netherlands). Next, splenocytes were cultured for 48 hours in RPMI 1640 medium (Life technologies, Carlsbad, CA) supplemented with 10% heat-inactivated fetal calf serum (FCS), 1% penicillin/streptomycin (Invitrogen), and 50  $\mu$ M  $\beta$ -Mercaptoethanol in the presence of 5  $\mu$ g/mL lipopolysaccharide (LPS). Subsequently, splenic B-lymphocytes obtained after ficoll gradient were cultured in a 96-well plate at a density of 1x 10<sup>5</sup> cells/well in the presence of 5  $\mu$ g/mL LPS. Splenic B-cells were treated with increasing concentrations of prednisolone or dexamethasone (both Centrafarm, Etten-Leur, the Netherlands). After 48 hours, relative cell viability was assessed using the CellTiter 2 96® Aqueous One Solution Cell Proliferation (MTS) Assay (Promega, Madison, WI). Absorbance was acquired using a plate reader (Infinite F50; TECAN, Männedorf, Switzerland). For AnnexinV analyses, splenic B-lymphocytes obtained from young (6-12 weeks of age) wild-type, *Ikzf1*<sup>+/-</sup>, *Btg1*<sup>-/-</sup> and *Btg1*<sup>-/-</sup>;*Ikzf1*<sup>+/-</sup> mice were treated for 48 hours with prednisolone or dexamethasone and stained with the AnnexinV-PE/7-AAD Viability Kit (BD Biosciences) according to manufacturer's instructions and analyzed by FACS. AnnexinV-positive cell fractions were determined by FlowJo software Version 10 (Treestar, Ashland, OR).

## References

1. van der Veer A, Waanders E, Pieters R, et al. Independent prognostic value of BCR-ABL1-like signature and *IKZF1* deletion, but not high *CRLF2* expression, in children with B-cell precursor ALL. *Blood*. 2013;**122**(15):2622-9.
2. Den Boer ML, van Slegtenhorst M, De Menezes RX, et al. A subtype of childhood acute lymphoblastic leukaemia with poor treatment outcome: a genome-wide classification study. *Lancet Oncol*. 2009;**10**(2):125-34.
3. Schindelin J, Arganda-Carreras I, Frise E, et al. Fiji: an open-source platform for biological-image analysis. *Nature methods*. 2012;**9**(7):676-82.

## Supplementary Tables

### Supplementary Table S1. Oligonucleotide primers used for genotyping and IG/TR clonality analysis.

| Gene locus             | Forward primer (5'-3')           | Reverse primer (5'-3')           |
|------------------------|----------------------------------|----------------------------------|
| Wild-type <i>Btg1</i>  | CCATGCATCCCTTCTACACCC            | TGCAGGCTCTGGCTGAAAGT             |
| Knockout <i>Btg1</i>   | CCATGCATCCCTTCTACACCC            | CGGAGAACCTGCGTGC AATC            |
| Wild-type <i>Ikzf1</i> | ATGGATGTCGATGAGGGTCAAGAC         | AGTTCTCTGAACACAGACACACGT         |
| Knockout <i>Ikzf1</i>  | GCGGAGCTCCTCAGGTGCAGGCTGCCTATC   | GACGCGTCGACGCTAACATCCTGAGGGACTGT |
| Trb1 (DJ)              | CAGCCCCCTTCAGCAAAGAT             | CCTAAGTTCCCTTCCAAGACCAT          |
| Trb2 (DJ)              | GTAGGCACCTGTGGGGAAGAAACT         | TGAGAGCTGTCTCCTACTATCCATT        |
| Igh                    | CCCGAATTCCAGGTCCAGTTGCAGCAGWCWGG | CCCGAATTCGCTCTCGCAGGAGAC         |
| Igk                    | CCCGAATTCCAGGTCCAGTTGCAGCAGWCWGG | CCCGAATTCTAACTGCTCACTGGA         |

**Supplementary Table S2. Representation of pediatric ALL subtypes in DCOG and COALL cohorts**

| ALL subtypes                       | DCOG (N=470) |      | COALL (N=128) |      | Total (N=598) |      | Literature* |
|------------------------------------|--------------|------|---------------|------|---------------|------|-------------|
|                                    | N            | Perc | N             | Perc | N             | Perc | Perc        |
| <i>ETV6-RUNX1</i>                  | 120          | 26%  | 34            | 27%  | 154           | 26%  | 25%         |
| High hyperdiploid (51-65 chr)      | 95           | 20%  | 31            | 24%  | 126           | 21%  | 25%         |
| Non- <i>BCR-ABL1</i> -like B-other | 80           | 17%  | 27            | 21%  | 107           | 18%  | 10-15%      |
| <i>BCR-ABL1</i> -like B-other      | 69           | 15%  | 23            | 18%  | 92            | 15%  | 10-15%      |
| <i>TCF3</i> -rearranged            | 17           | 4%   | 2             | 2%   | 19            | 3%   | 5%          |
| <i>BCR-ABL1</i>                    | 22           | 5%   | 2             | 2%   | 24            | 4%   | 3%          |
| <i>MLL</i> -rearranged             | 10           | 2%   | 1             | 1%   | 11            | 2%   | 2%          |
| T-ALL                              | 57           | 12%  | 8             | 6%   | 65            | 11%  | 15%         |

\* Pui et al, Journal of Clinical Oncology 2011

**Supplementary Table S3. Co-occurrence of *BTG1* deletion with other common gene deletions in BCP-ALL**

|                             | <i>BTG1</i> no deletion |      | <i>BTG1</i> deletion |      | Fisher Test |            |
|-----------------------------|-------------------------|------|----------------------|------|-------------|------------|
|                             | N                       | Perc | N                    | Perc | P-value     | Odds ratio |
| <i>IKZF1</i> no deletion    | 397                     | 0.82 | 31                   | 0.65 | 0.0071      | 2.5        |
| <i>IKZF1</i> deletion       | 88                      | 0.18 | 17                   | 0.35 |             |            |
| <i>PAX5</i> no deletion     | 352                     | 0.73 | 33                   | 0.69 | 0.61        | 1.2        |
| <i>PAX5</i> deletion        | 133                     | 0.27 | 15                   | 0.31 |             |            |
| <i>CDKN2A/B</i> no deletion | 323                     | 0.67 | 28                   | 0.58 | 0.27        | 1.4        |
| <i>CDKN2A/B</i> deletion    | 162                     | 0.33 | 20                   | 0.42 |             |            |
| <i>EBF1</i> no deletion     | 462                     | 0.95 | 39                   | 0.81 | 0.0011      | 4.6        |
| <i>EBF1</i> deletion        | 23                      | 0.05 | 9                    | 0.19 |             |            |
| <i>RB1</i> no deletion      | 451                     | 0.93 | 40                   | 0.83 | 0.042       | 2.6        |
| <i>RB1</i> deletion         | 34                      | 0.07 | 8                    | 0.17 |             |            |
| <i>ETV6</i> no deletion     | 351                     | 0.72 | 25                   | 0.52 | 0.0046      | 2.4        |
| <i>ETV6</i> deletion        | 134                     | 0.28 | 23                   | 0.48 |             |            |

**Supplementary Table S4. Outcome analysis in BCP-ALL cases double-deleted for common gene deletions and *IKZF1* versus *IKZF1*-only deleted cases**

| <b>PAX5</b>           |              |                |              | <b>Univariate</b>    |               |                        |              | <b>multivariate</b>    |              |
|-----------------------|--------------|----------------|--------------|----------------------|---------------|------------------------|--------------|------------------------|--------------|
| <b>Deletion</b>       | <b>Total</b> | <b>Relapse</b> | <b>Death</b> | <b>5-yr CIR (SE)</b> | <b>Gray P</b> | <b>EFS HR (95% CI)</b> | <b>Cox P</b> | <b>EFS HR (95% CI)</b> | <b>Cox P</b> |
| <i>PAX5;IKZF1</i>     | 50           | 17             | 3            | 32% (7%)             | 0.8           | 1.0<br>(0.6-1.9)       | 0.9          | 0.7<br>(0.3-1.3)       | 0.2          |
| <i>IKZF1</i>          | 55           | 18             | 4            | 33% (7%)             |               |                        |              |                        |              |
| <i>PAX5</i>           | 98           | 19             | 1            | 19% (4%)             |               |                        |              |                        |              |
| none                  | 330          | 36             | 11           | 11% (2%)             |               |                        |              |                        |              |
| <b>CDKN2A/B</b>       |              |                |              | <b>Univariate</b>    |               |                        |              | <b>multivariate</b>    |              |
| <b>Deletion</b>       | <b>Total</b> | <b>Relapse</b> | <b>Death</b> | <b>5-yr CIR (SE)</b> | <b>Gray P</b> | <b>EFS HR (95% CI)</b> | <b>Cox P</b> | <b>EFS HR (95% CI)</b> | <b>Cox P</b> |
| <i>CDKN2A/B;IKZF1</i> | 52           | 20             | 3            | 39% (7%)             | 0.2           | 1.4<br>(0.8-2.5)       | 0.3          | 0.9<br>(0.4-1.8)       | 0.7          |
| <i>IKZF1</i>          | 53           | 15             | 4            | 26% (6%)             |               |                        |              |                        |              |
| <i>CDKN2A/B</i>       | 130          | 23             | 5            | 18% (4%)             |               |                        |              |                        |              |
| none                  | 298          | 32             | 7            | 10% (2%)             |               |                        |              |                        |              |
| <b>EBF1</b>           |              |                |              | <b>Univariate</b>    |               |                        |              | <b>multivariate</b>    |              |
| <b>Deletion</b>       | <b>Total</b> | <b>Relapse</b> | <b>Death</b> | <b>5-yr CIR (SE)</b> | <b>Gray P</b> | <b>EFS HR (95% CI)</b> | <b>Cox P</b> | <b>EFS HR (95% CI)</b> | <b>Cox P</b> |
| <i>EBF1;IKZF1</i>     | 9            | 3              | 1            | 22% (15%)            | 0.9           | 1.2<br>(0.4-3.3)       | 0.7          | 2.1<br>(0.7-6.9)       | 0.2          |
| <i>IKZF1</i>          | 96           | 32             | 6            | 33% (5%)             |               |                        |              |                        |              |
| <i>EBF1</i>           | 23           | 3              | 0            | 15% (8%)             |               |                        |              |                        |              |
| none                  | 405          | 52             | 12           | 13% (2%)             |               |                        |              |                        |              |
| <b>RB1</b>            |              |                |              | <b>Univariate</b>    |               |                        |              | <b>multivariate</b>    |              |
| <b>Deletion</b>       | <b>Total</b> | <b>Relapse</b> | <b>Death</b> | <b>5-yr CIR (SE)</b> | <b>Gray P</b> | <b>EFS HR (95% CI)</b> | <b>Cox P</b> | <b>EFS HR (95% CI)</b> | <b>Cox P</b> |
| <i>RB1;IKZF1</i>      | 14           | 5              | 1            | 37% (14%)            | 0.7           | 1.2<br>(0.5-2.9)       | 0.6          | 0.6<br>(0.2-1.6)       | 0.3          |
| <i>IKZF1</i>          | 91           | 30             | 6            | 31% (5%)             |               |                        |              |                        |              |
| <i>RB1</i>            | 28           | 5              | 1            | 18% (8%)             |               |                        |              |                        |              |
| none                  | 400          | 50             | 11           | 12% (2%)             |               |                        |              |                        |              |
| <b>ETV6</b>           |              |                |              | <b>Univariate</b>    |               |                        |              | <b>multivariate</b>    |              |
| <b>Deletion</b>       | <b>Total</b> | <b>Relapse</b> | <b>Death</b> | <b>5-yr CIR (SE)</b> | <b>Gray P</b> | <b>EFS HR (95% CI)</b> | <b>Cox P</b> | <b>EFS HR (95% CI)</b> | <b>Cox P</b> |
| <i>ETV6;IKZF1</i>     | 25           | 10             | 0            | 40% (10%)            | 0.4           | 1.0<br>(0.5-2.0)       | 0.9          | 1.5<br>(0.7-3.4)       | 0.3          |
| <i>IKZF1</i>          | 80           | 25             | 7            | 30% (5%)             |               |                        |              |                        |              |
| <i>ETV6</i>           | 132          | 11             | 1            | 8% (3%)              |               |                        |              |                        |              |
| none                  | 296          | 44             | 11           | 15% (2%)             |               |                        |              |                        |              |

CIR, cumulative incidence of relapse; SE, standard error; EFS, event-free survival; HR, hazard ratio; CI, confidence interval; multivariate, corrected for BCP-ALL subtype and stratified for study cohort (DCOG, COALL)

**Supplementary Table S5. Excel data sheet with leukemia phenotype mouse tumors**

## Supplementary Figures

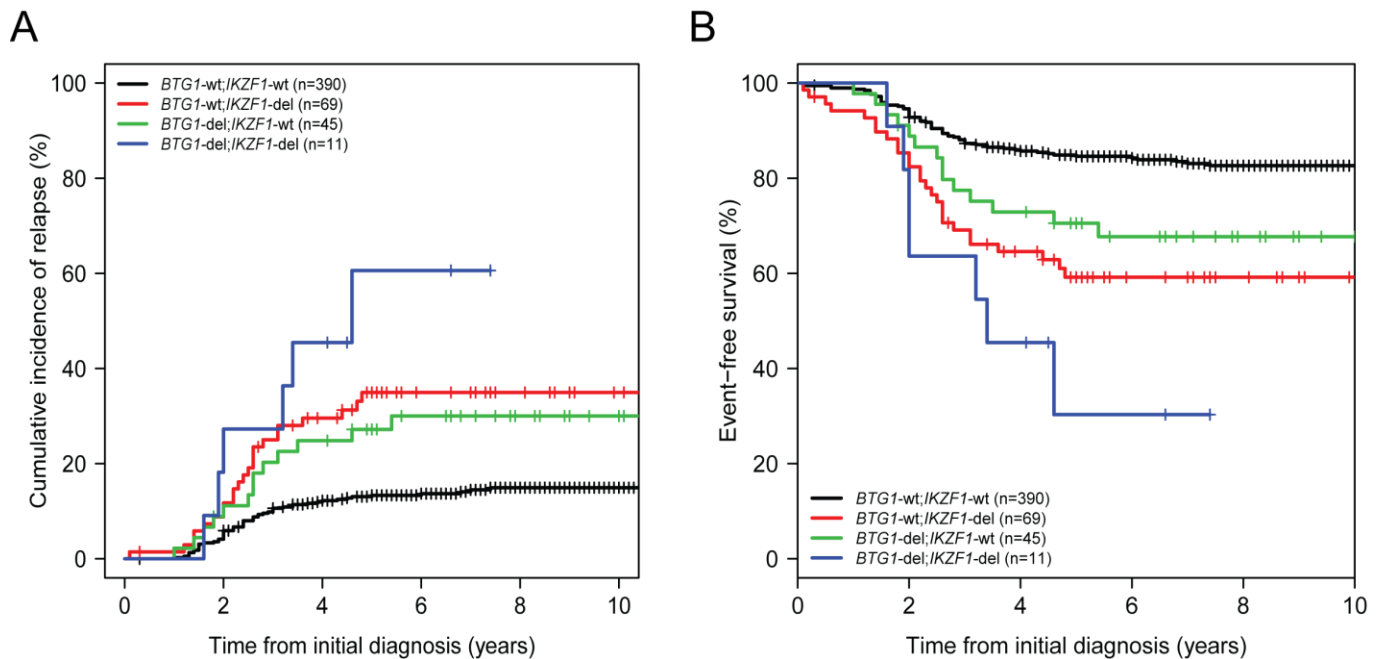

**Supplementary Figure S1.** Cumulative incidence of relapse (CIR) and event-free survival (EFS) curves for pediatric BCP-ALL cases from the Australian and New Zealand Children's Oncology Group (ANZCHOG) ALL8 trial with or without *IKZF1* and *BTG1* deletions. **(A)** CIR and **(B)** EFS curves for total BCP-ALL cohort (n=515). Colors: black, *IKZF1* and *BTG1*-wildtype; green, *IKZF1*-wildtype, *BTG1*-deleted; red, *IKZF1*-deleted, *BTG1*-wildtype; blue, both *BTG1* and *IKZF1*-deleted. Abbreviations: wt, wildtype; del, deletion; n, total number.



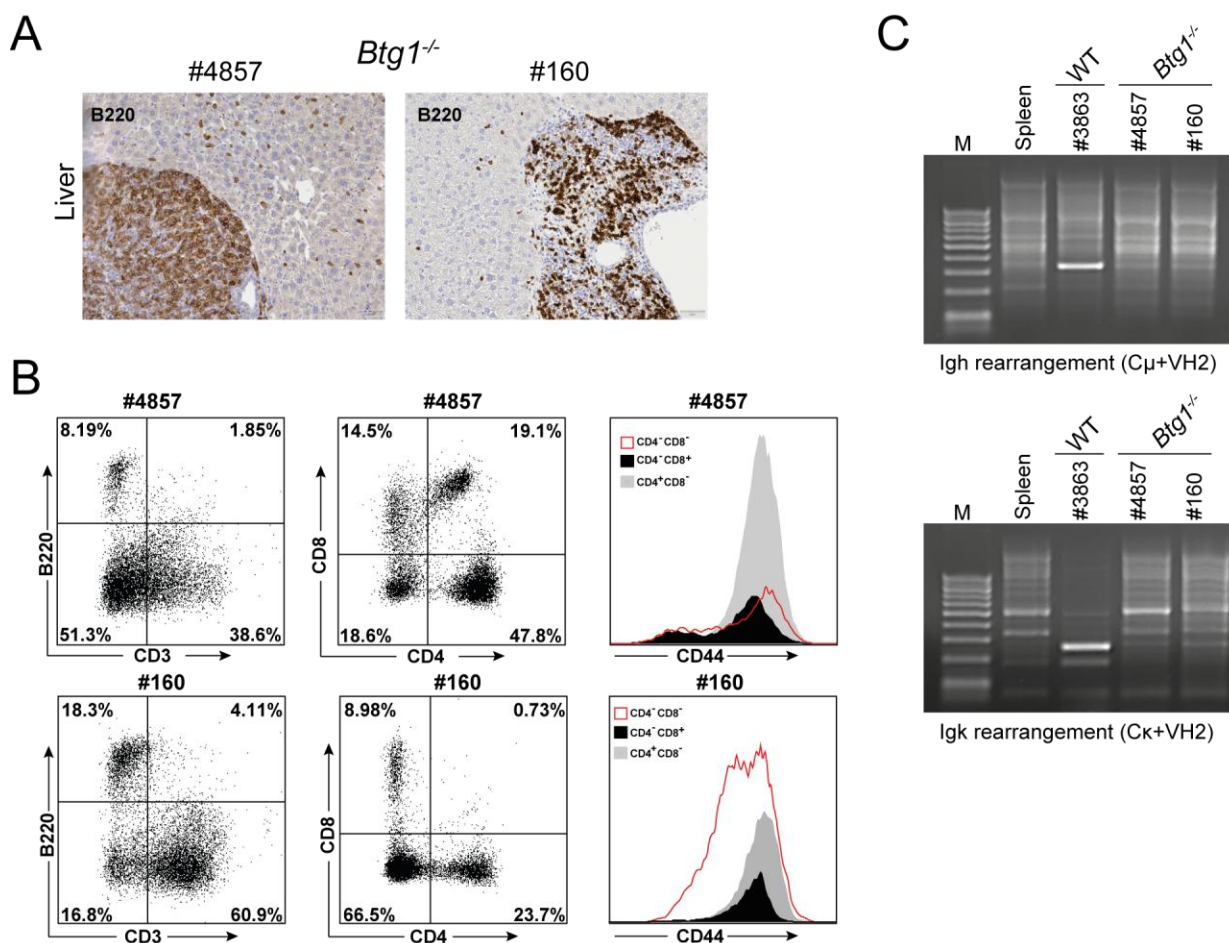

**Supplementary Figure S2. Characteristics of *Btg1*-deficient T-cell leukemias.** (A-B) T-cell leukemias in *Btg1*-deficient mice are characterized by a significant proportion of B220<sup>+</sup> B-lymphocytes within the tumor area, which can be demonstrated by B220-positive staining as determined by immunohistochemistry of infiltrated liver (A) and flow cytometry of the primary leukemia (B). (B) T-cell leukemias in *Btg1* knockout mice are characterized by relative high expression of CD44, which is evident in both CD3<sup>+</sup>CD4<sup>-</sup>CD8<sup>-</sup> fraction (red line), CD3<sup>+</sup>CD4<sup>-</sup>CD8<sup>+</sup> fraction (black curve) and CD3<sup>+</sup>CD4<sup>+</sup>CD8<sup>-</sup> fraction (gray curve). (C) Immunoglobulin gene rearrangements for heavy chain (Igh) and kappa light chain (Igk) show clonal rearrangement in B-cell malignancies derived from wild-type C57Bl/6J mice, but not in leukemias derived from *Btg1*<sup>-/-</sup> mice, indicating that B220<sup>+</sup> cells in leukemic infiltrates of *Btg1*<sup>-/-</sup> mice represent non-leukemic B-cells.

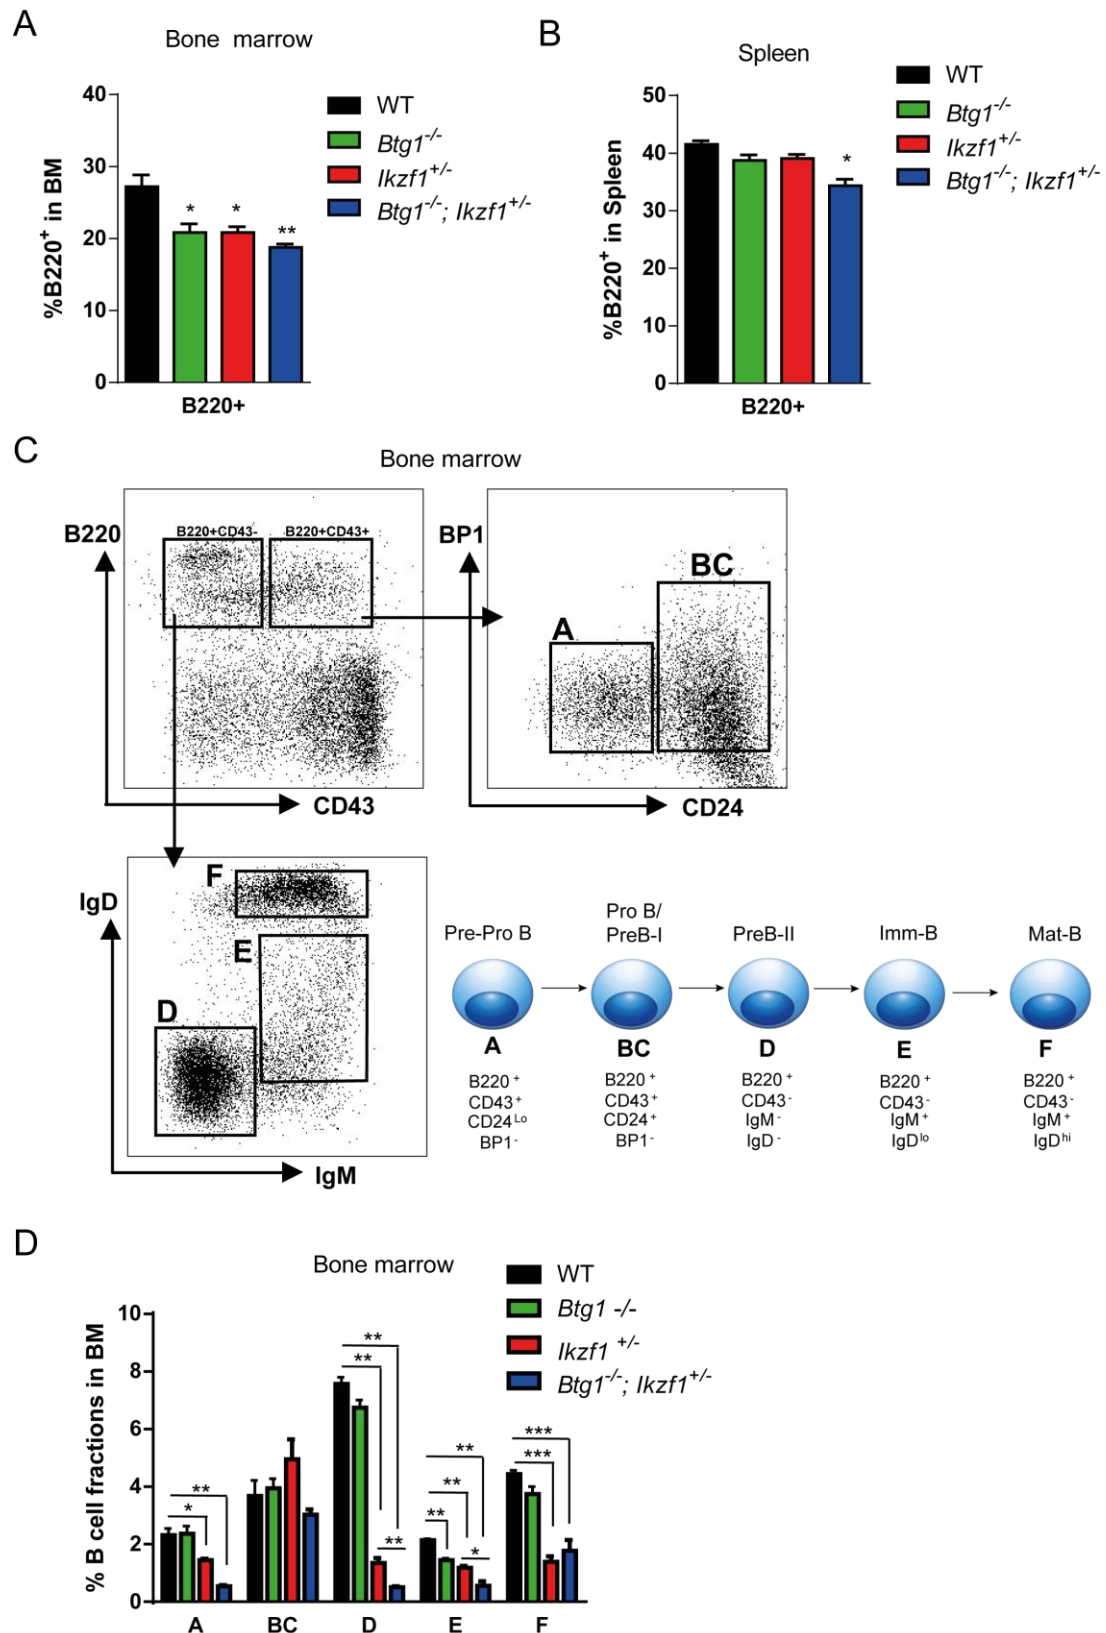

**Supplementary Figure S3. Analysis of B-cell development in *Ikzf1*<sup>+/-</sup>, *Btg1*<sup>-/-</sup> and *Btg1*<sup>-/-</sup>;*Ikzf1*<sup>+/-</sup> mice in bone marrow and spleen.** Bone marrow (BM) and splenic cells from WT, *Ikzf1*<sup>+/-</sup>, *Btg1*<sup>-/-</sup> and *Btg1*<sup>-/-</sup>;*Ikzf1*<sup>+/-</sup> mice were stained with an antibody cocktail against B220, CD43, BP-1, IgD and IgM. (A-B) Flow cytometric analysis on the fraction of B220<sup>+</sup>-cells in bone marrow (A) and spleen (B) of the

different genotypes (n=4). (C) Representative gating strategy of the early B-lymphoid populations in the bone marrow compartment. After gating on the viable cell population and according to B220 and CD43 expression levels, the B220<sup>+</sup>CD43<sup>+</sup> population was further analyzed for their BP-1 and CD24 expression to identify Hardy Fraction A (B220<sup>+</sup>CD43<sup>+</sup>BP-1<sup>-</sup>CD24<sup>-</sup>) and BC (B220<sup>+</sup>CD43<sup>+</sup>BP-1<sup>-</sup>CD24<sup>+</sup>). Hardy fraction D, E and F were identified by gating for the B220<sup>+</sup>CD43<sup>-</sup> population. Subsequently IgD and IgM expression levels in the B220<sup>+</sup>CD43<sup>-</sup> gate were used to distinguish Hardy fraction D (B220<sup>+</sup>CD43<sup>-</sup>IgM<sup>-</sup>IgD<sup>-</sup>) Hardy fraction E (B220<sup>+</sup>CD43<sup>-</sup>IgM<sup>+</sup>IgD<sup>low</sup>) and F (B220<sup>+</sup>CD43<sup>-</sup>IgM<sup>+</sup>IgD<sup>high</sup>). (D) The relative percentages of different Hardy fractions within the bone marrow compartment is indicated for BM of WT, *Ikzf1*<sup>+/-</sup>, *Btg1*<sup>-/-</sup> and *Btg1*<sup>-/-</sup>;*Ikzf1*<sup>+/-</sup> mice (n=4). Data for all experiments are means, and error bars represent SEM. *P* values (two-sided *t* test) are indicated. \**P*<0.05, \*\**P*<0.01, and \*\*\**P*<0.001.

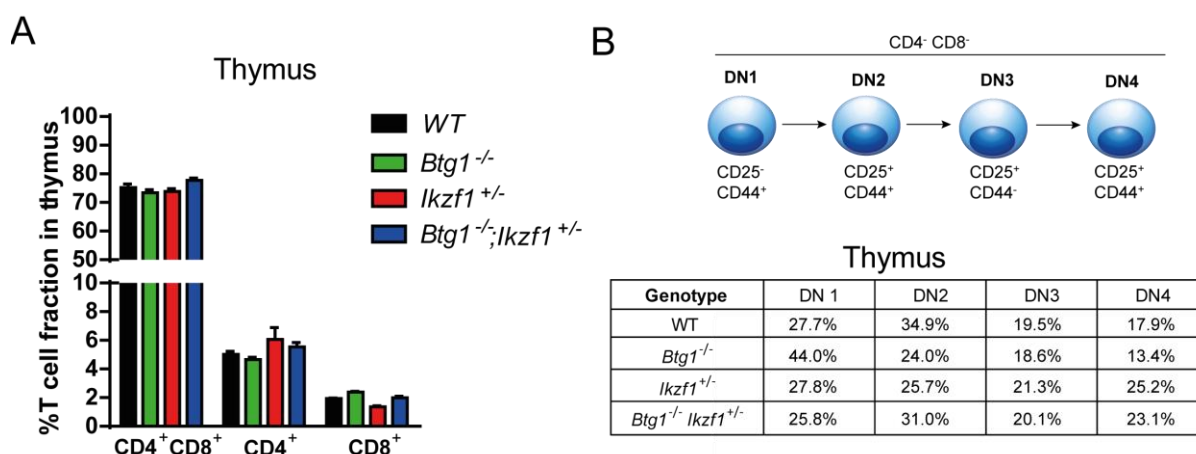

**Supplementary Figure S4. Analysis of T-lymphopoiesis in *Ikzf1*<sup>+/-</sup>, *Btg1*<sup>-/-</sup> and *Btg1*<sup>-/-</sup>;*Ikzf1*<sup>+/-</sup> mice.**

(A-B) Flow cytometric analysis was performed on the lymphoid cells isolated from thymus of wild-type (WT), *Ikzf1*<sup>+/-</sup>, *Btg1*<sup>-/-</sup> and *Btg1*<sup>-/-</sup>;*Ikzf1*<sup>+/-</sup> mice (n=3). Cells were stained with an antibody cocktail against CD3, CD4, CD8, CD44 and CD25 to identify the different stages of T-cell development. (A) Thymocytes were analyzed for expression of CD4 and CD8. (B) Early T-cell development can be identified in the CD4<sup>-</sup>CD8<sup>-</sup> double negative (DN) T-cell fraction. To further distinguish the DN stages of T cell development, the CD4<sup>-</sup>CD8<sup>-</sup> cells were gated for CD25 and CD44 expression. DN1 is defined as CD44<sup>+</sup>CD25<sup>-</sup> fraction, DN2 as CD44<sup>+</sup>CD25<sup>+</sup> fraction, DN3 as CD44<sup>-</sup>CD25<sup>+</sup> fraction and DN4 as CD44<sup>-</sup>CD25<sup>-</sup> fraction in the thymus. Each value represents the mean of three mice. Data are means, and error bars represent SEM.

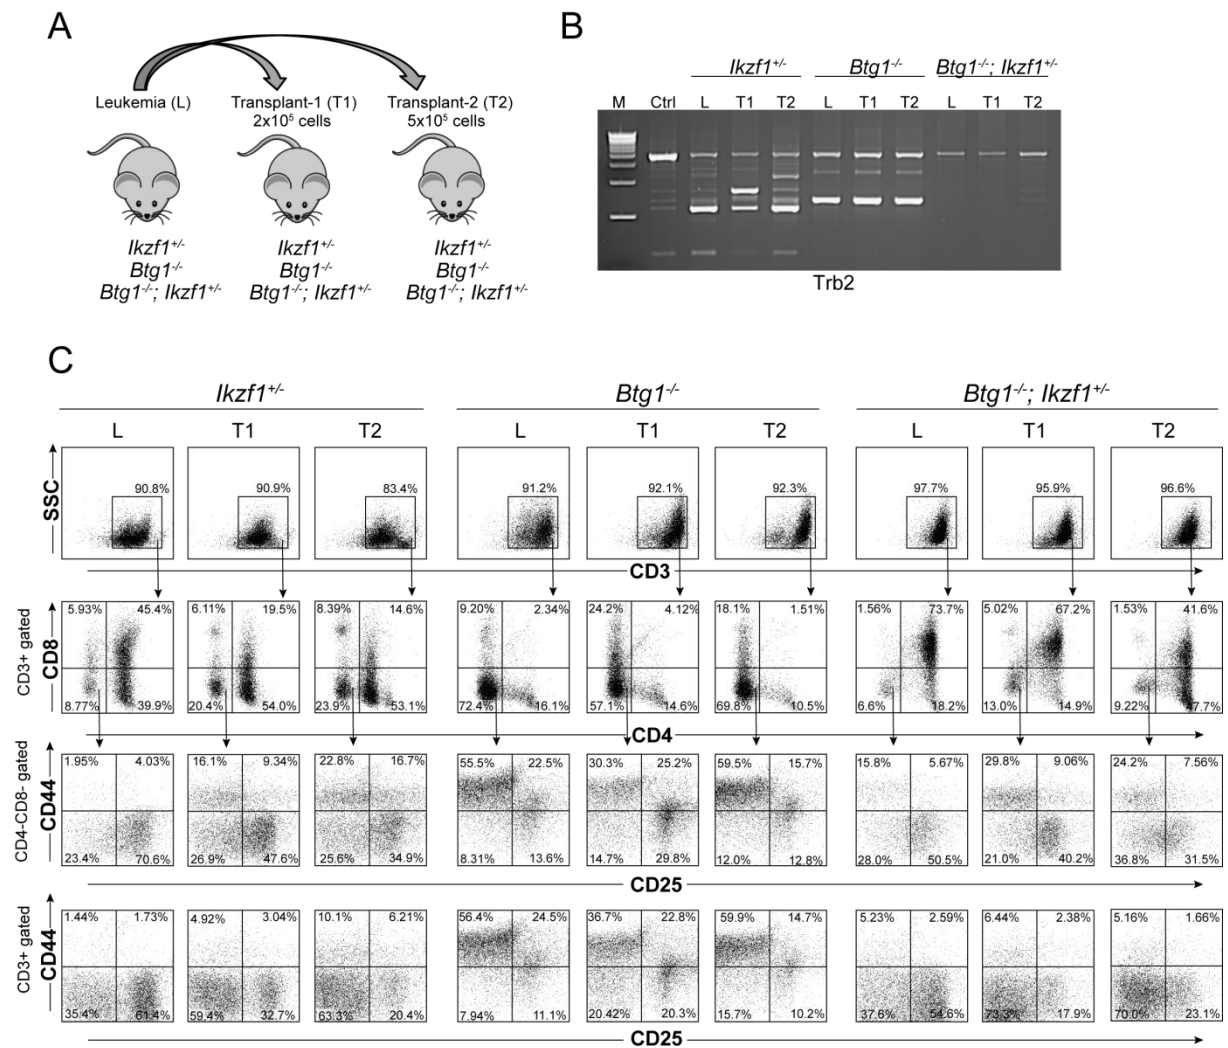

**Supplementary Figure S5. Leukemias arising in *Btg1* and *Ikzf1* knockout animals are (oligo)clonal and transplantable into syngeneic mice. (A)** Schematic overview of the transplantation experiments. Leukemias (L) derived from either *Ikzf1*<sup>+/-</sup>, *Btg1*<sup>-/-</sup>, and *Ikzf1*<sup>+/-</sup>;*Btg1*<sup>-/-</sup> mice were transplanted intravenously into syngeneic mice at a concentration of  $2 \times 10^5$  cells (transplant-1; T1) or  $5 \times 10^5$  cells (transplant-2; T2). T-cell leukemias were observed 4 weeks after transplantation. **(B)** T-cell receptor beta 2 (*Trb2*) gene rearrangements were determined by PCR on DNA isolated from non-lymphoid tissue (earclip) as control for germline configuration, and DNA derived from L, T1 and T2 tumor tissues of *Ikzf1*<sup>+/-</sup>, *Btg1*<sup>-/-</sup>, and *Ikzf1*<sup>+/-</sup>;*Btg1*<sup>-/-</sup> mice. **(C)** Flow cytometry was performed on the original leukemia (L) and two independent serial transplantations (T1 and T2). The upper panel shows the side scatter (SSC) and CD3 profile. The CD3-positive fraction was subsequent analyzed for CD4 and CD8 staining (second panel) and gated for the CD4<sup>-</sup>CD8<sup>-</sup> fraction to analyze CD44 and CD25 expression (third panel) as well as on the complete CD3<sup>+</sup> fraction (fourth panel).

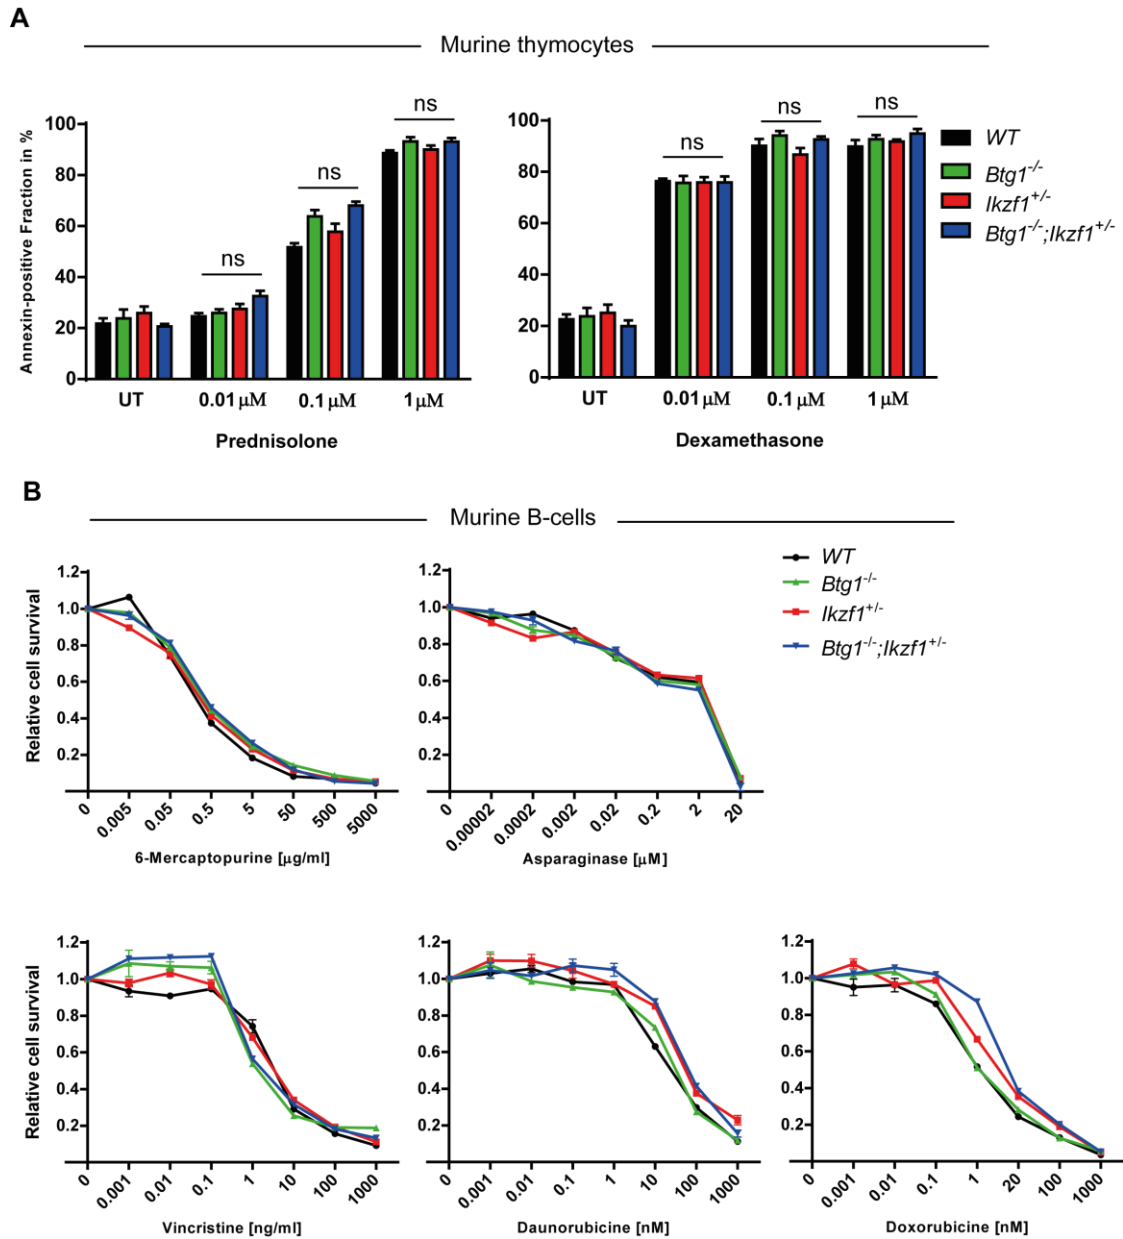

**Supplementary Figure S6. Chemotherapy response in primary lymphoid cells isolated from *Ikzf1*<sup>+/-</sup>, *Btg1*<sup>-/-</sup> and *Btg1*<sup>-/-</sup>; *Ikzf1*<sup>+/-</sup> mice.** (A) AnnexinV/7-AAD staining of WT, *Ikzf1*<sup>+/-</sup>, *Btg1*<sup>-/-</sup> and *Btg1*<sup>-/-</sup>; *Ikzf1*<sup>+/-</sup> murine thymocytes after treatment with increasing concentrations of prednisolone (left panel) or dexamethasone (right panel) for 12 hours (n=4) or left untreated (UT). The fraction of AnnexinV-positive cells was determined. Data are means, and error bars represent SEM. Differences were statistically non-significant (ns) as assessed by two-sided t-test. (B) Splenocytes isolated from wild-type (WT), *Ikzf1*<sup>+/-</sup>, *Btg1*<sup>-/-</sup> and *Btg1*<sup>-/-</sup>; *Ikzf1*<sup>+/-</sup> mice were stimulated with lipopolysaccharide (LPS) for 48 hrs. Ficoll-purified splenic B-cells were treated with increasing concentrations of common single chemotherapeutic agents used in ALL treatment. Cells were treated with 6-mercaptopurine, daunorubicine, vincristine or doxorubicine for 48 hours, or for 72 hours with asparaginase, and analyzed by MTS assay. All values were normalized to untreated B-cells. Error bars represent ± standard error of the mean (SEM) and a two-sided ANOVA was performed for statistical analysis (n=2).
