# Supplementary material for: Tumor suppressors BTG1 and IKZF1 cooperate during mouse leukemia development and increase relapse risk in B-cell precursor acute lymphoblastic leukemia patients
Source: PubMed Central journal article supplement — Haematologica. 2016 Dec 14;102(3):541–51. doi: 10.3324/haematol.2016.153023 (PMC5394950; doi:10.3324/haematol.2016.153023), 2017-03
Supplement: 2016_153023-Disclosures_and_Contributions.pdf [file 2016_153023-Disclosures_and_Contributions.pdf]

Haematologica  
HAEMATOL/2016/153023  
Version 4

Tumor suppressors BTG1 and IKZF1 cooperate during mouse leukemia development and increase relapse risk in B-cell precursor acute lymphoblastic leukemia patients

Blanca Scheijen, Judith M. Boer, Rene' Marke, Esther Tijchon, Dorette van Ingen Schenau, Esme' Waanders, Liesbeth van Emst, Laurens T. van der Meer, Rob Pieters, Gabriele Escherich, Martin A. Horstmann, Edwin Sonneveld, Nicola Venn, Rosemary Sutton, Luciano Dalla-Pozza, Roland P. Kuiper, Peter M. Hoogerbrugge, Monique L. den Boer, and Frank N. van Leeuwen

Disclosures: None

Contributions: Authorship Contributions BS, JMB, RM, ET, DvIS and LvE performed experiments and collected data; BS, ET, EW, DvIS, RM, LTvdM, RPK, ES, RP, GE, MAH, NV, RS, LD, PMH, JMB, MLdB, and FNvL collected, analyzed and interpreted data; BS, JMB, MLdB and FNvL designed the research; BS, RM, ET, JMB, MLdB and FNvL wrote the manuscript. All authors reviewed and approved the manuscript.
